# Supplementary material
Source: Springer Nature journal article supplement (https://www.springermedizin.de/resource/supplementary/13058_2004_912_MOESM3_ESM.pdf/9705626)

**(a)****OS according to presence of nuclear ARF**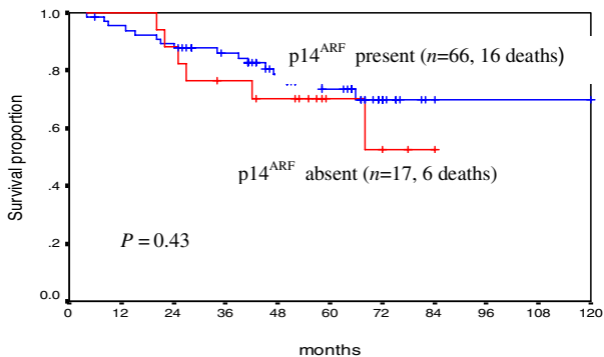**(b)****OS according to presence of cytoplasmic ARF**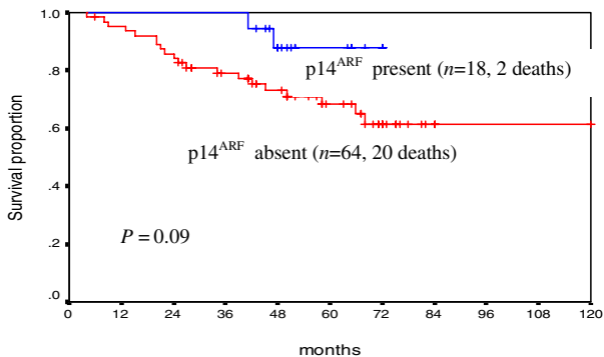**(c)****OS according to presence of cytoplasmic Hdm2**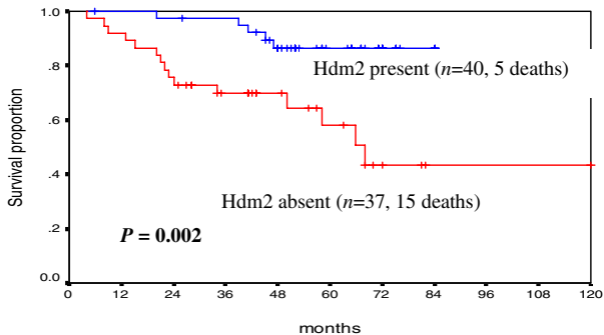

Supplement: MOESM3 [file 9705626]
